# Supplementary material for: The Influence of the Molecular Structure of Compounds on Their Properties and the Occurrence of Chiral Smectic Phases
Source: MDPI journal article supplement (doi:10.3390/ma17030618), 2024-01-27
Supplement: s1 [file s1]

## Supplementary materials for the article

### The influence of the molecular structure of compounds on their properties and the occurrence of chiral smectic phases

Magdalena Urbańska<sup>1\*</sup>, Monika Zając<sup>1</sup>, Paweł Perkowski<sup>2</sup>, Aleksandra Deptuch<sup>3</sup>

<sup>1</sup>*Institute of Chemistry, Military University of Technology, Kaliskiego 2, 00-908*

*Warsaw, Poland*

<sup>2</sup>*Institute of Applied Physics, Military University of Technology, Kaliskiego 2, 00-908*

*Warsaw, Poland*

<sup>3</sup>*Institute of Nuclear Physics Polish Academy of Sciences, Radzikowskiego 152, 313-42*

*Krakow, Poland*

*\*Corresponding author: Magdalena Urbańska, e-mail: magdalena.urbanska@wat.edu.pl*

#### MASS SPECTRA OF MESOGENS

The purity of the liquid crystalline esters was recorded using a Shimadzu prominence chromatograph. The strong molecular ion with a captured sodium atom  $[M + Na]^+$  was observed; see Figures S1 and S2.

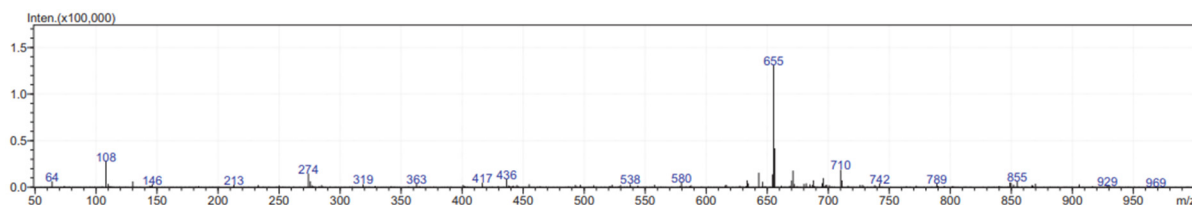

Figure S1. Mass spectrum of the compound 3PhPhCH<sub>2</sub>O.

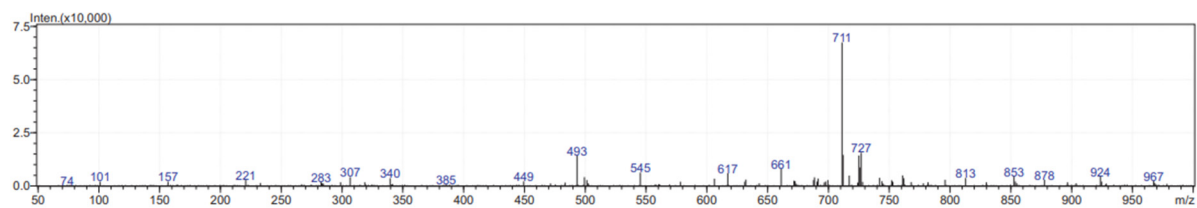

**Figure S2.** Mass spectrum of the compound 7PhPhCH<sub>2</sub>O.

### STRUCTURE CONFIRMATION OF MESOGENS

A comparison of NMR spectra confirmed the compliance of real structures with the planned structures; see Figures S3-S6.

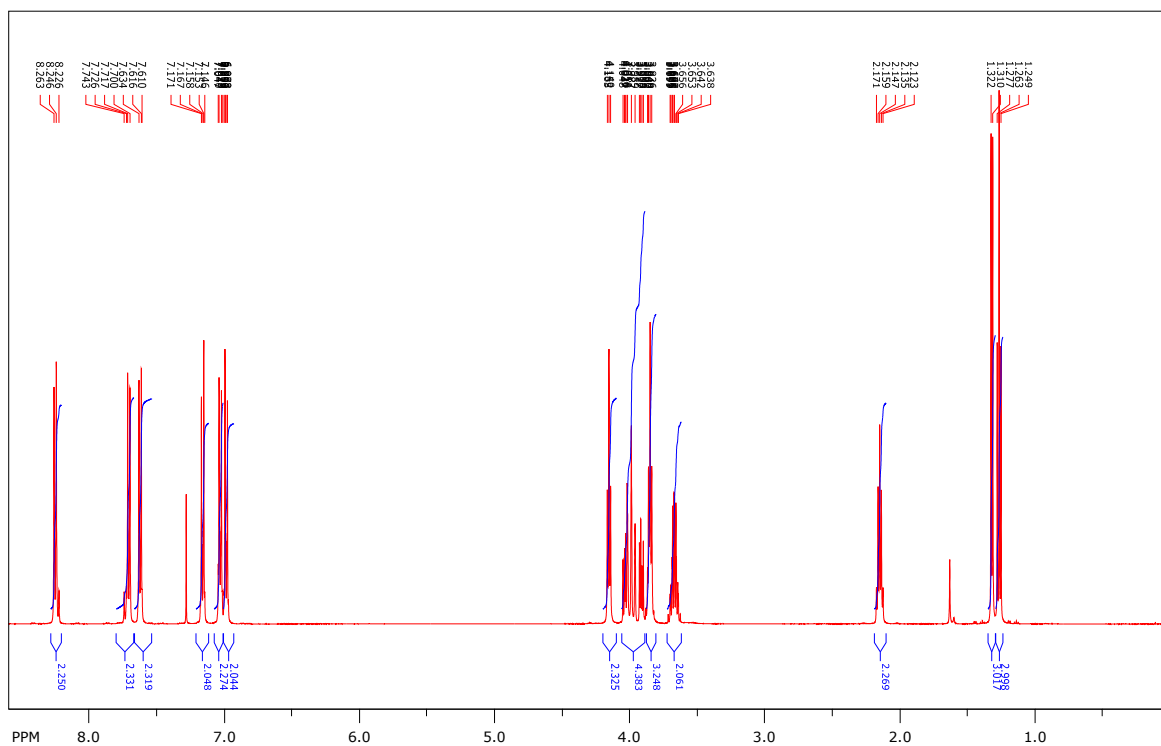

**Figure S3.** <sup>1</sup>H NMR spectrum of the compound 3PhPhCH<sub>2</sub>O in CDCl<sub>3</sub>.

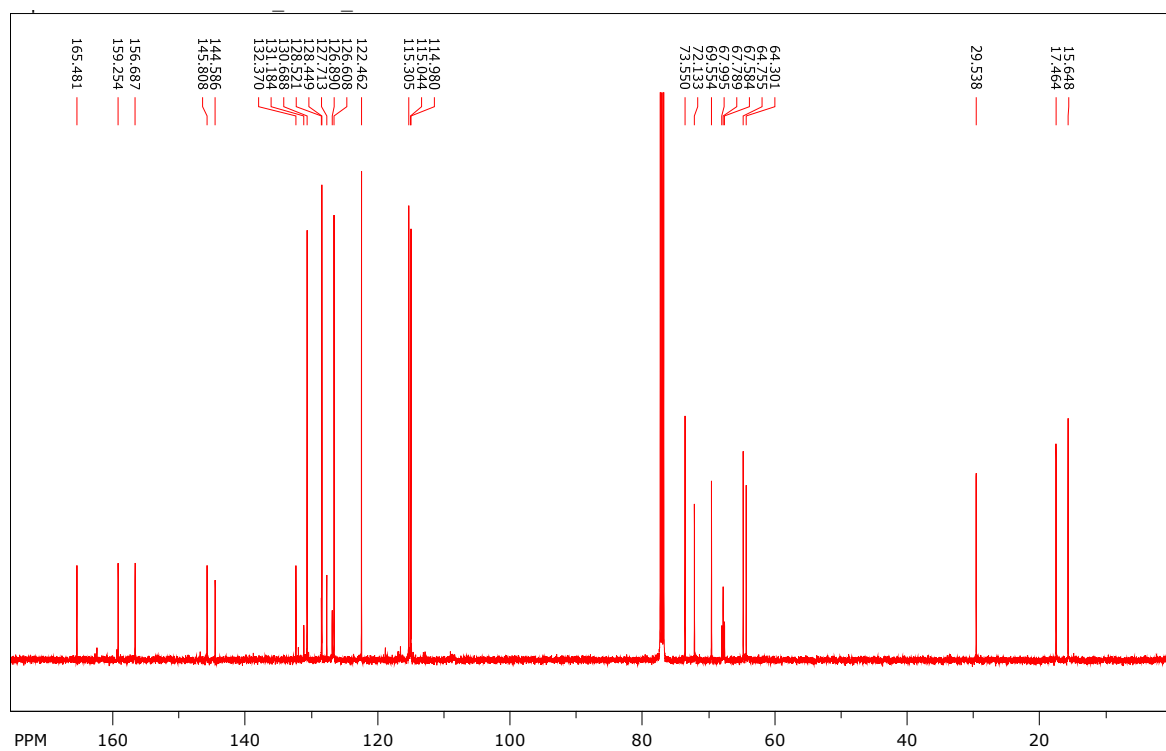

**Figure S4.** <sup>13</sup>C NMR spectrum of the compound 3PhPhCH<sub>2</sub>O in CDCl<sub>3</sub>.

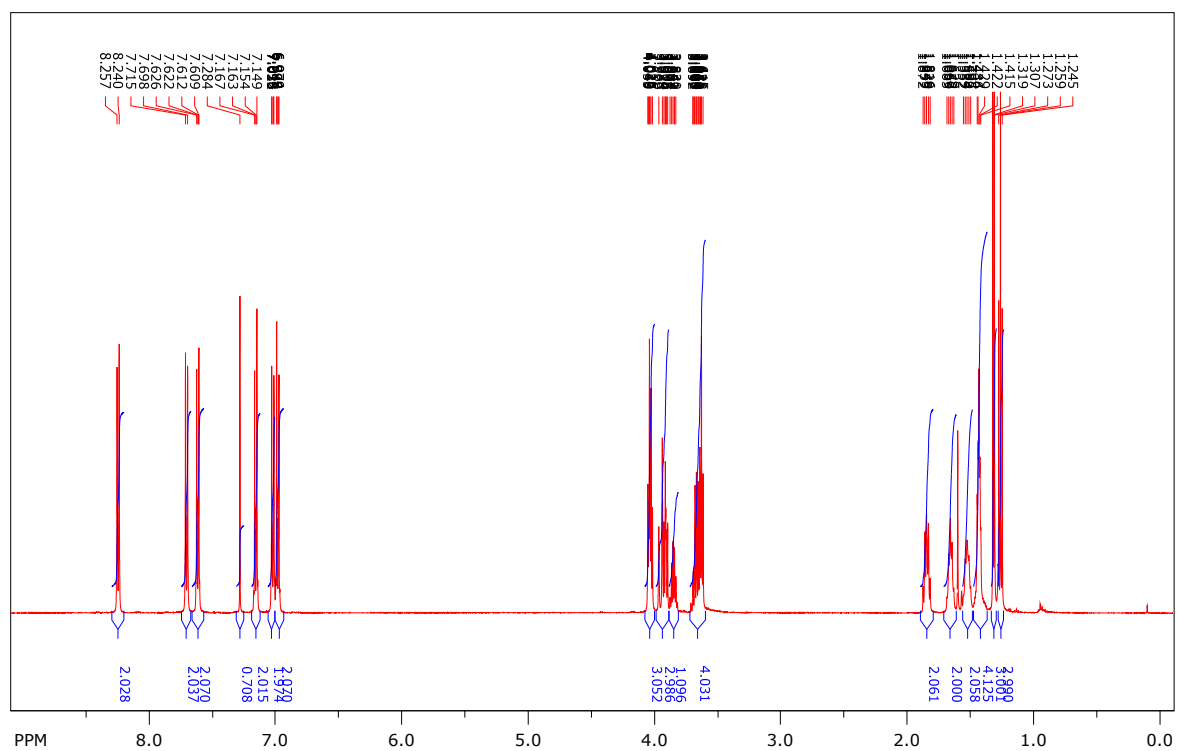

**Figure S5.** <sup>1</sup>H NMR spectrum of the compound 7PhPhCH<sub>2</sub>O in CDCl<sub>3</sub>.

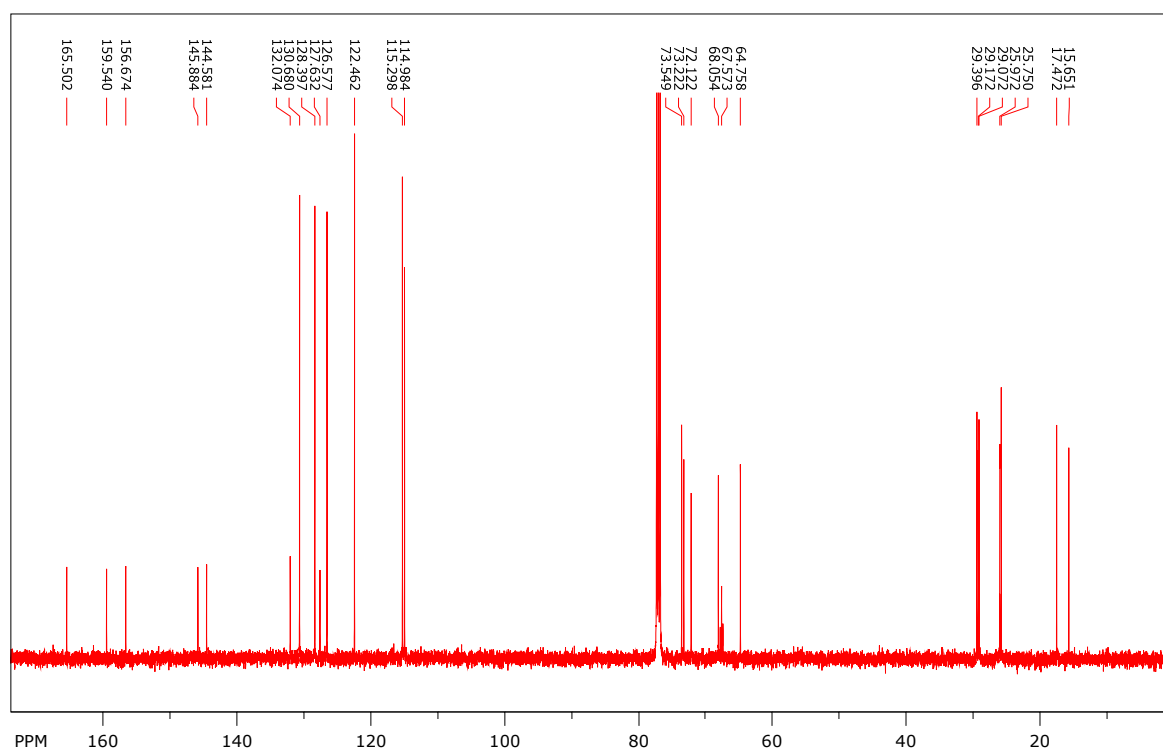

**Figure S6.**  $^{13}\text{C}$  NMR spectrum of the compound 7PhPhCH<sub>2</sub>O in CDCl<sub>3</sub>.

The chemical shift values for obtained mesogens are given in Tables S1 and S2. Protons are marked as shown below:

### A. 3PhPhCH<sub>2</sub>O

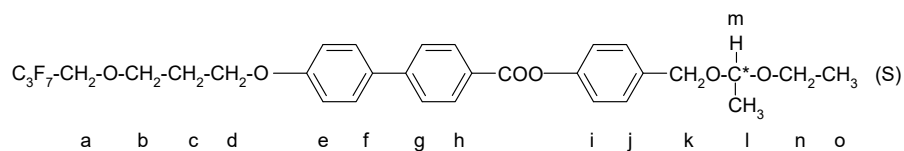

### B. 7PhPhCH<sub>2</sub>O

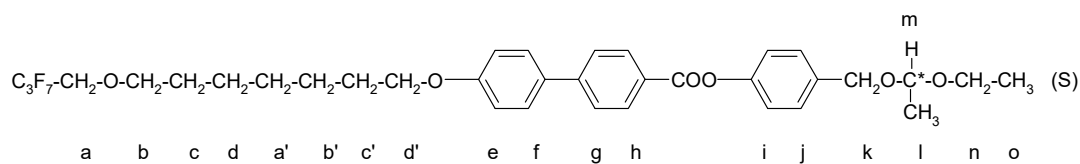

**Table S1.** <sup>1</sup>H NMR chemical shift data (ppm) for mesogens in CDCl<sub>3</sub> solution.

| Protons   | Mesogen A.    | Mesogen B.           |
|-----------|---------------|----------------------|
| <b>a</b>  | 3.917 (2H, t) | 3.914 (2H, t)        |
| <b>b</b>  | 3.670 (2H, t) | 3.664 (2H, t)        |
| <b>c</b>  | 2.147 (2H, m) | 1.415-1.872 (10H, m) |
| <b>d</b>  | 4.037 (2H, t) |                      |
| <b>a'</b> |               |                      |
| <b>b'</b> |               |                      |
| <b>c'</b> |               |                      |
| <b>d'</b> |               | 3.966 (2H, t)        |
| <b>e</b>  | 7.023 (2H, d) | 7.028 (2H, d)        |
| <b>f</b>  | 7.158 (2H, d) | 7.163 (2H, d)        |
| <b>g</b>  | 7.616 (2H, d) | 7.622 (2H, d)        |
| <b>h</b>  | 7.726 (2H, d) | 7.715 (2H, d)        |
| <b>i</b>  | 6.992 (2H, d) | 6.988 (2H, d)        |
| <b>j</b>  | 8.246 (2H, d) | 8.257 (2H, d)        |
| <b>k</b>  | 3.860 (2H, t) | 3.853 (2H, t)        |
| <b>l</b>  | 1.310 (3H, d) | 1.307 (3H, d)        |
| <b>m</b>  | 4.152 (1H, m) | 4.040 (1H, m)        |
| <b>n</b>  | 1.322 (2H, m) | 1.319 (2H, m)        |
| <b>o</b>  | 1.263 (3H, t) | 1.259 (3H, t)        |

**Table S2.** Values of chemical shifts for the chiral center (atoms “m”) of mesogens in  $^1\text{H}$  and  $^{13}\text{C}$  NMR spectra.

|                   |                 |                                                     |
|-------------------|-----------------|-----------------------------------------------------|
| <b>Mesogen A.</b> | 4.152<br>67.789 | $^1\text{H}$ NMR [ppm]<br>$^{13}\text{C}$ NMR [ppm] |
| <b>Mesogen B.</b> | 4.040<br>68.054 | $^1\text{H}$ NMR [ppm]<br>$^{13}\text{C}$ NMR [ppm] |

### 3D PLOTS OF IMAGINARY PART $\epsilon''_{\perp}$ OF DIELECTRIC PERMITTIVITY VERSUS FREQUENCY AND TEMPERATURE AT COOLING WITH THE 10 V DC FIELD FOR BOTH STUDIED MESOGENS

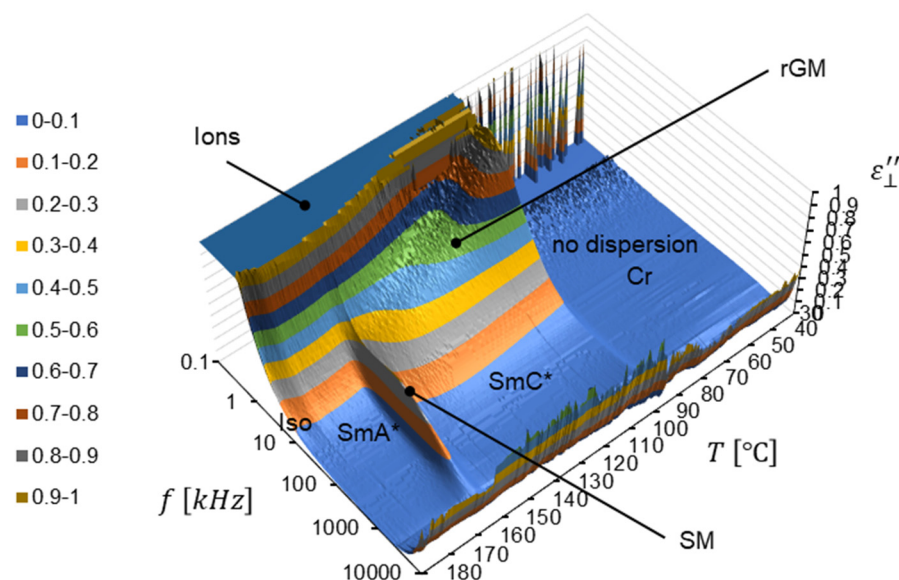

**Figure S7.** Imaginary part  $\epsilon''_{\perp}$  of dielectric permittivity for the compound 3PhPhCH<sub>2</sub>O. In 5  $\mu\text{m}$  thin cell measurement at cooling, planarly aligned, with gold electrodes. Cooling rate 0.5°C/min. The 10 V DC field. Isotropic liquid, the SmA\* (soft mode: SM) and the SmC\* (residual Goldstone mode: rGM) phases, and molecular crystal (Cr) are observed.

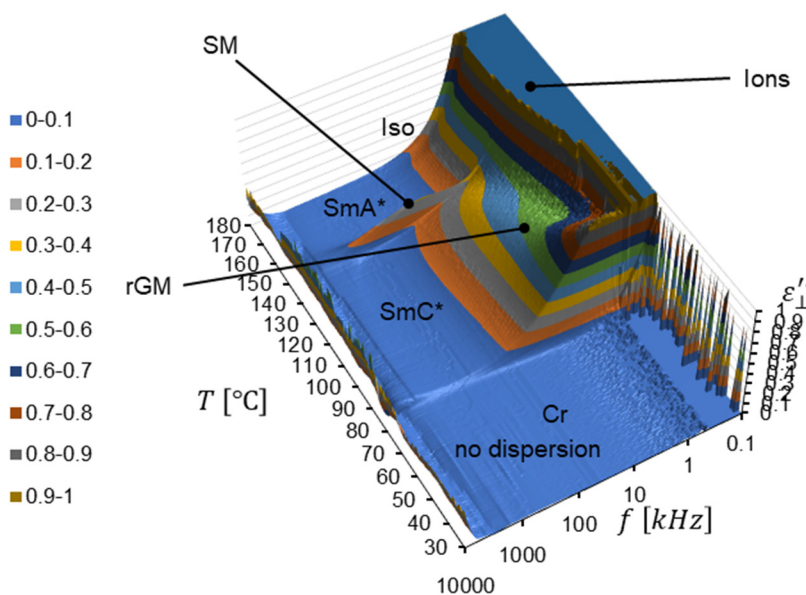

**Figure S8.** Imaginary part  $\epsilon''_{\perp}$  of dielectric permittivity for the compound 3PhPhCH<sub>2</sub>O. In 5  $\mu\text{m}$  thin cell measurement at cooling, planarly aligned, with gold electrodes. Cooling rate 0.5°C/min. The 10 V DC field. Isotropic liquid, the SmA\* (soft mode: SM) and the SmC\* (residual Goldstone mode: rGM) phases, and molecular crystal (Cr) are observed.

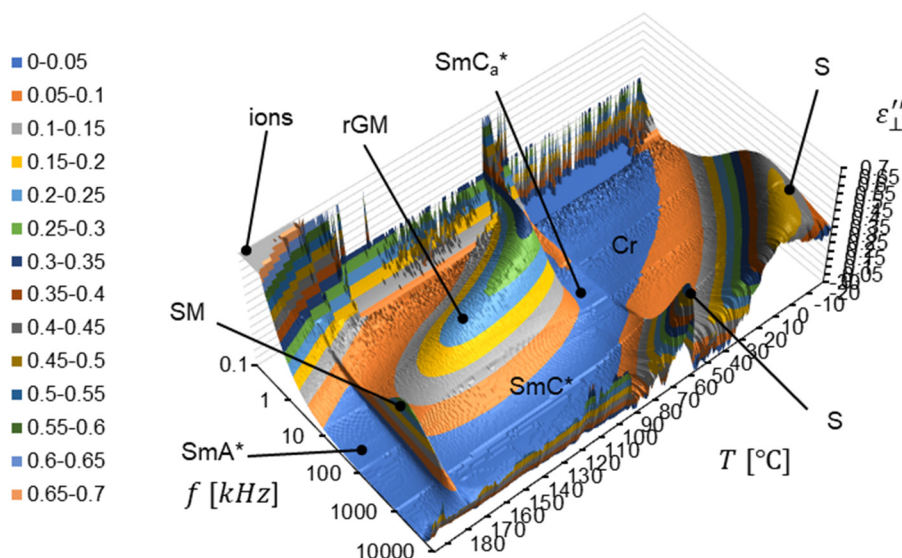

**Figure S9.** Imaginary part  $\epsilon''_{\perp}$  of dielectric permittivity for the compound 7PhPhCH<sub>2</sub>O. In 5  $\mu\text{m}$  thin cell measurement at cooling, planarly aligned, with gold electrodes. Cooling rate 0.5°C/min. The 10 V DC field. The SmA\* (soft mode: SM), the SmC\* (residual Goldstone mode: rGM), the SmC<sub>a</sub>\* (molecular S-mode) phases, and molecular crystal (Cr) (molecular S-mode) are observed.



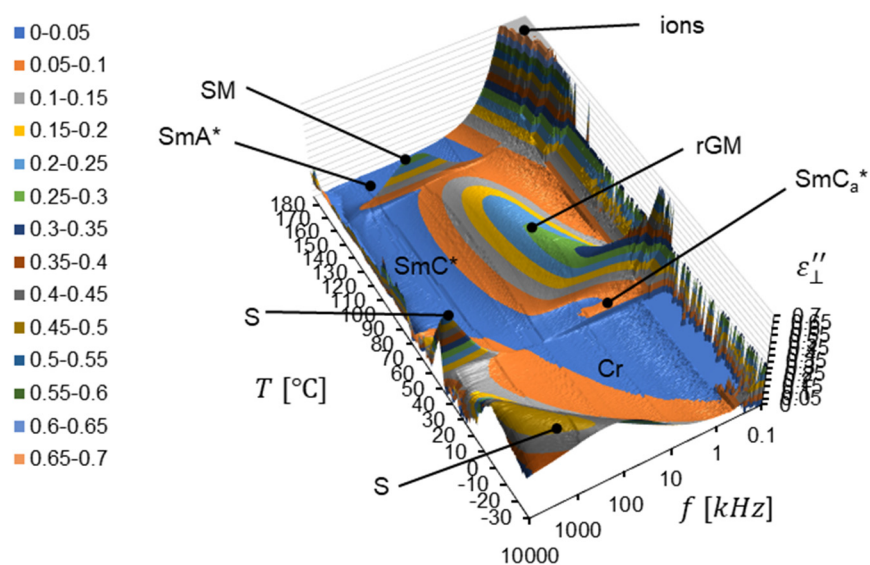

**Figure S10.** Imaginary part  $\epsilon''_{\perp}$  of dielectric permittivity for the compound 7PhPhCH<sub>2</sub>O. In 5  $\mu\text{m}$  thin cell measurement at cooling, planarly aligned, with gold electrodes. Cooling rate 0.5°C/min. The 10 V DC field. The SmA\* (soft mode: SM), the SmC\* (residual Goldstone mode: rGM), the SmC<sub>a</sub>\* (molecular S-mode) phases, and molecular crystal (Cr) (molecular S-mode) are observed.
